# Supplementary material for: DDX17 modulates the expression and alternative splicing of genes involved in apoptosis and proliferation in lung adenocarcinoma cells
Source: PeerJ. 2022 Sep 21;10:e13895. doi: 10.7717/peerj.13895 (PMC9508879; doi:10.7717/peerj.13895)
Supplement: Supplemental Information 1 [file peerj-10-13895-s001.xlsx]

## Sheet: data for RNASeqPower
SampleID	Raw	Clean	Clean Per	Raw base	Clean base	Base Per	Unique Tag	Q20	Q30	GC	DUP
siCtrl_1st	85832104	82558263	0.9619	12.87G	11.31G	0.8786	33209195(40.23%)	0.9816	0.9419	0.495	0.8821
siCtrl_2nd	75970356	73018900	0.9611	11.40G	9.96G	0.874	30054289(41.16%)	0.9804	0.9392	0.5	0.8741
siCtrl_3rd	92276792	89209301	0.9668	13.84G	12.24G	0.884	34849484(39.06%)	0.9819	0.9427	0.495	0.8885
siDDX17_1st	86169702	83094729	0.9643	12.93G	11.37G	0.8797	34855399(41.95%)	0.9816	0.942	0.495	0.8753
siDDX17_2nd	82445678	79373049	0.9627	12.37G	10.78G	0.8719	34240551(43.14%)	0.982	0.9427	0.495	0.8663
siDDX17_3rd	86092996	82491661	0.9582	12.91G	11.28G	0.8733	35168057(42.63%)	0.9809	0.94	0.495	0.871
